# Supplementary material for: Atomic layer deposition of vanadium oxides for thin-film lithium-ion battery applications
Source: Royal Society of Chemistry journal article supplement (doi:10.1039/c6ra25742a), 2016-01-01
Supplement: c6ra25742a1.pdf [file c6ra25742a1.pdf]

# **Supplementary information to 'Atomic Layer Deposition of Vanadium Oxides for Thin-film Lithium-Ion Battery Applications'**

Felix Mattelaer,\* Kobe Geryl, Thomas Dobbelaere, Geert Rampelberg, Jolien  
Dendooven, and Christophe Detavernier

*Department of Solid State Sciences, Ghent University, Krijgslaan 281 S1, 9000 Gent,  
Belgium*

E-mail: felix.mattelaer@Ugent.be

---

\*To whom correspondence should be addressed

## In-situ XRD

To demonstrate the formation of the phases that are examined electrochemically, in-situ X-ray diffraction is done during the formation of the phases. Table 1 shows an overview of the atmosphere, temperature and initial film conditions used to obtain all phases between  $\text{VO}_2$  and  $\text{V}_2\text{O}_5$ . Figures 1 to 6 show the resulting isXRD plots on the current collector substrate, demonstrating the successful phase formation.

Table 1: Conversion paths from the as-deposited films to their crystallised and oxidized forms, on the Pt-substrate.

| Phase                     | ALD reactant                         | Ambient                  | Temperature (°C) |
|---------------------------|--------------------------------------|--------------------------|------------------|
| $\text{VO}_2$ (B)         | $\text{O}_3$                         | He + 3.7 Pa $\text{O}_2$ | 420              |
| $\text{VO}_2$ (M1)        | $\text{H}_2\text{O}$                 | He + 18 Pa $\text{O}_2$  | 450              |
| $\text{V}_6\text{O}_{13}$ | $\text{O}_3$                         | He + 3.7 Pa $\text{O}_2$ | 550              |
| $\text{V}_4\text{O}_9$    | $\text{H}_2\text{O}$                 | Ambient air              | 356              |
| $\text{V}_3\text{O}_7$    | $\text{O}_3$                         | He + 48 Pa $\text{O}_2$  | 560              |
| $\text{V}_2\text{O}_5$    | $\text{H}_2\text{O}$ or $\text{O}_3$ | Ambient air              | 500              |

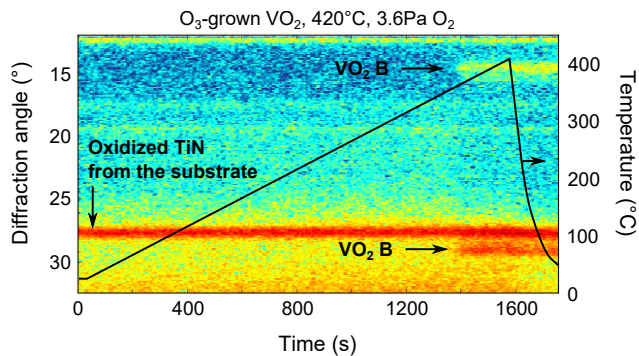

Figure 1: In-situ XRD during the oxidation of ozone-grown amorphous  $\text{VO}_2$  to crystalline  $\text{VO}_2$  B on the Pt substrate. The temperature was ramped linearly to  $420^\circ\text{C}$  in an ambient consisting of He +  $3.6\text{Pa O}_2$ .

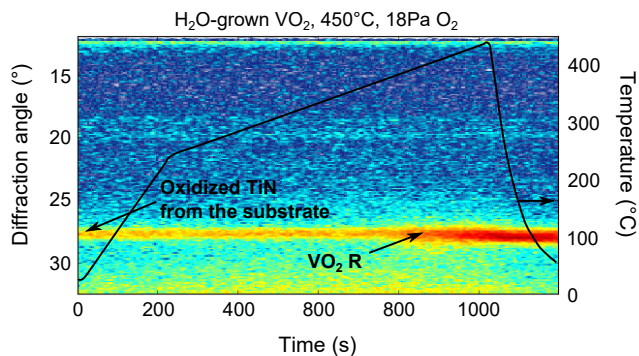

Figure 2: In-situ XRD during the oxidation of water-grown amorphous  $\text{VO}_2$  to crystalline  $\text{VO}_2$  M1 on the Pt substrate. The temperature was ramped to  $450^\circ\text{C}$  in an ambient consisting of He +  $18\text{Pa O}_2$ .

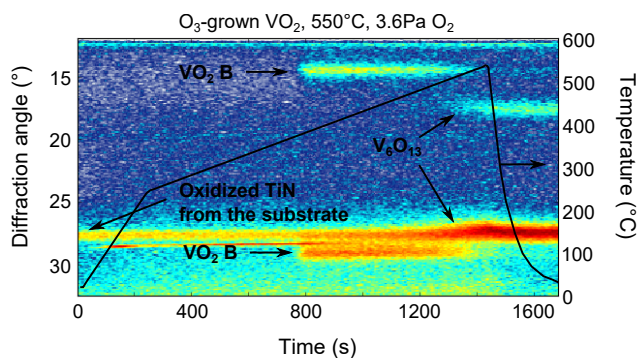

Figure 3: In-situ XRD during the oxidation of ozone-grown amorphous  $\text{VO}_2$  to crystalline  $\text{V}_6\text{O}_{13}$  on the Pt substrate. The temperature was ramped to  $550^\circ\text{C}$  in an ambient consisting of He +  $3.6\text{Pa O}_2$ .

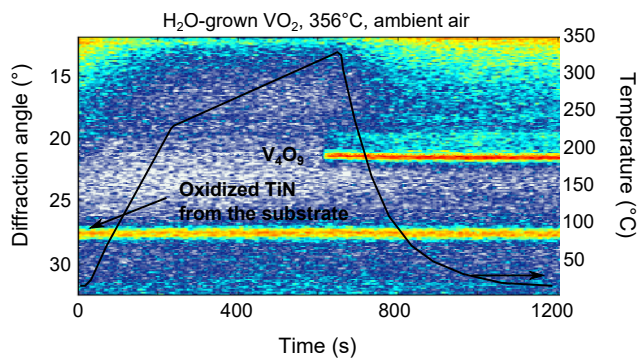

Figure 4: In-situ XRD during the oxidation of water-grown amorphous VO<sub>2</sub> to crystalline V<sub>4</sub>O<sub>9</sub> on the Pt substrate. The temperature was ramped to 356 °C in ambient air.

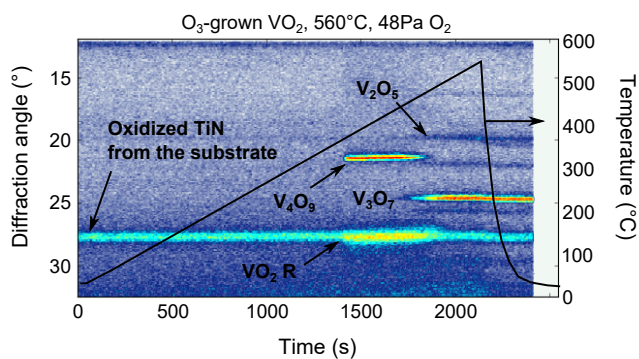

Figure 5: In-situ XRD during the oxidation of ozone-grown amorphous VO<sub>2</sub> to crystalline V<sub>3</sub>O<sub>7</sub> on the Pt substrate. The temperature was ramped to 560 °C in He + 48Pa O<sub>2</sub>.

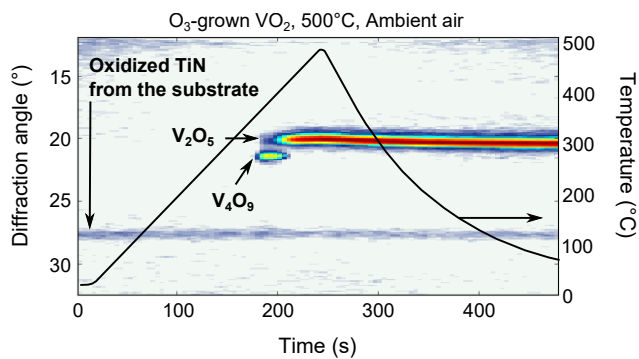

Figure 6: In-situ XRD during the oxidation of ozone-grown amorphous VO<sub>2</sub> to crystalline V<sub>2</sub>O<sub>5</sub> on the Pt substrate. The temperature was ramped linearly to 500 °C in ambient air.

# Cyclic voltammetry on the Pt substrate and the VO<sub>2</sub> M1 phase

Figure 7 shows the cyclic voltammograms of the VO<sub>2</sub> M1 film and of the uncoated Pt substrate. Some similarities can be seen between the peak positions of both cyclic voltammograms. Furthermore, galvanostatic charge-discharging showed the film displayed almost no storage capacity, indicating almost no bulk energy storage, and thus mostly surface-related electrochemical activity is present for these films.

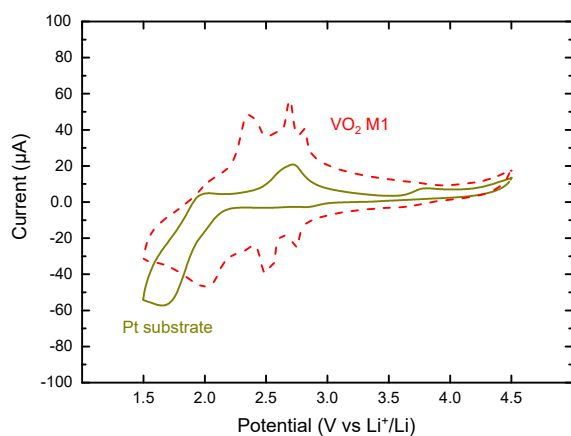

Figure 7: Cyclic voltammetry on the Pt substrate and VO<sub>2</sub> M1 thin film, performed at  $10 \text{ mV s}^{-1}$  in a 3-electrode setup with lithium as counter and reference electrodes, and 1M LiClO<sub>4</sub> in PC as electrolyte.
